# Supplementary material
Source: PubMed Central journal article supplement (PMC6707870)
Supplement: NIHMS1530479-supplement-1.pdf [file NIHMS1530479-supplement-1.pdf]

## Supplementary Tables

**Table S1. Regression output of PA-aIMT on waist circumference (GLMM)**

| Parameter     | B        | Std. Error | df   | t      | Sig. | 95% Confidence Interval |              |
|---------------|----------|------------|------|--------|------|-------------------------|--------------|
|               |          |            |      |        |      | Lower Bound             | Upper Bound  |
| Intercept     | 2.569849 | .082147    | 3856 | 31.284 | .000 | 2.408794                | 2.730904     |
| Waist         | .006488  | .000639    | 3856 | 10.157 | .000 | .005236                 | .007740      |
| Triglycerides | -.000366 | .000138    | 3856 | -2.662 | .008 | -.000636                | -9.653928E-5 |
| HDL-C (mg/dL) | -.001811 | .000645    | 3856 | -2.807 | .005 | -.003075                | -.000546     |

GLMM= Generalized linear mixed model; HDL-C = High density lipoprotein cholesterol; PA-aIMT = Proximal ascending aortic intima-media thickness.

**Table S2. Regression output of PA-aIMT on waist/height ration (GLMM)**

| Parameter     | B        | Std. Error | df   | t      | Sig. | 95% Confidence Interval |             |
|---------------|----------|------------|------|--------|------|-------------------------|-------------|
|               |          |            |      |        |      | Lower Bound             | Upper Bound |
| Intercept     | 2.517650 | .085087    | 3895 | 29.589 | .000 | 2.350831                | 2.684470    |
| WHtR          | 1.117252 | .108062    | 3895 | 10.339 | .000 | .905389                 | 1.329115    |
| [Sex=0]       | .082614  | .020013    | 3895 | 4.128  | .000 | .043376                 | .121852     |
| [Sex=1]       | 0        | 0          | .    | .      | .    | .                       | .           |
| Triglycerides | -.000395 | .000138    | 3895 | -2.860 | .004 | -.000665                | -.000124    |
| HDL-C (mg/dL) | -.001593 | .000665    | 3895 | -2.396 | .017 | -.002897                | -.000289    |

GLMM= Generalized linear mixed model; HDL-C = High density lipoprotein cholesterol; PA-aIMT = Proximal ascending aortic intima-media thickness; WHtR = Waist-to-height ratio. (Male = 0)

**Table S3. Regression output of PA-aIMT on subcutaneous adipose tissue (linear regression model)**

| Model                                          | Unstandardized Coefficients |            | Standardized Coefficients | t      | Sig. |
|------------------------------------------------|-----------------------------|------------|---------------------------|--------|------|
|                                                | B                           | Std. Error | Beta                      |        |      |
| Constant                                       | 3.095                       | .078       |                           | 39.753 | .000 |
| Subcutaneous Adipose Tissue (cm <sup>3</sup> ) | 8.468E-5                    | .000       | .140                      | 4.235  | .000 |
| Sex                                            | -.121                       | .043       | -.099                     | -2.837 | .005 |
| HDL-C (mg/dL)                                  | -.003                       | .001       | -.070                     | -2.245 | .025 |

HDL-C = High density lipoprotein cholesterol; PA-aIMT = Proximal ascending aortic intima-media thickness

**Table S4. Regression output of PA-aIMT on visceral adipose tissue (linear regression model)**

| Model                                      | Unstandardized Coefficients |            | Standardized Coefficients | t      | Sig. |
|--------------------------------------------|-----------------------------|------------|---------------------------|--------|------|
|                                            | B                           | Std. Error | Beta                      |        |      |
| Constant                                   | 3.155                       | .085       |                           | 36.979 | .000 |
| Visceral Adipose Tissue (cm <sup>3</sup> ) | .00011                      | .000       | .065                      | 2.169  | .030 |
| HDL-C (mg/dL)                              | -.00345                     | .001       | -.082                     | -2.740 | .006 |

HDL-C = High density lipoprotein cholesterol; PA-aIMT = Proximal ascending aortic intima-media thickness
